# Supplementary material for: Enhanced energy transfer by Sb ion doping for efficient CsPbCl3:Mn2+perovskite nanocrystals and light emitting diodes
Source: Royal Society of Chemistry journal article supplement (doi:10.1039/d2tc03538c), 2023-01-01
Supplement: d2tc03538c1.pdf [file d2tc03538c1.pdf]

## Supporting Information

Nan Wang<sup>1#</sup>, Rui Sun<sup>1#</sup>, Wen Xu<sup>2\*</sup>, Xue Bai<sup>1</sup>, Junhua Hu<sup>3</sup>, Siyu Lu<sup>4</sup>, Donglei Zhou<sup>1\*</sup>,  
Hongwei Song<sup>1\*</sup>

<sup>1</sup> *State Key Laboratory on Integrated Optoelectronics, College of Electronic Science and Engineering, Jilin University, Changchun, 130012, China.*

<sup>2</sup> *Key Laboratory of New Energy and Rare Earth Resource Utilization of State Ethnic Affairs Commission, Dalian Minzu University, Dalian, 116600, China.*

<sup>3</sup> *State Centre for International Cooperation on Designer Low-Carbon & Environmental Materials, School of Materials Science and Engineering, Zhengzhou University, Zhengzhou 450001, China.*

<sup>4</sup> *College of Chemistry, Zhengzhou University, Zhengzhou, 450001, China.*

*\*E-mail: Prof. Wen Xu (xuwen@dlnu.edu.cn), Prof. Donglei Zhou (zhoudl@jlu.edu.cn), Prof. Hongwei Song (songhw@jlu.edu.cn)*

## Experimental

### 1. Chemicals

1-octadecene (ODE, 90%), oleic acid (OA, 90%), oleylamine (OAm, 70%), cyclohexane, lead chloride ( $\text{PbCl}_2$ ), manganese chloride ( $\text{MnCl}_2$ ), antimony trichloride ( $\text{SbCl}_3$ ), and toluene, ethyl acetate. All chemicals were directly used without further purification.

### 2. Preparation of Cs-oleate

0.407g of  $\text{Cs}_2\text{CO}_3$ , 10 ml of ODE, and 1.25 ml OA were loaded into a 20 ml glass bottle. The mixture was heated for 1h at 130 °C until  $\text{Cs}_2\text{CO}_3$  was completely dissolved to form a clear solution.

3. Synthesis of the  $\text{Mn}^{2+}$  doped or  $\text{Mn}^{2+}$  and  $\text{Sb}^{3+}$  co-doped  $\text{CsPbCl}_3$  NCs. The  $\text{Mn}^{2+}$  doped or  $\text{Mn}^{2+}$  and  $\text{Sb}^{3+}$  co-doped  $\text{CsPbCl}_3$  NCs were synthesized by hot injection method. In a typical synthesis, 0.375 mmol of  $\text{PbCl}_2$ ,  $\text{MnCl}_2$  (and  $\text{SbCl}_3$ ), ODE (10 ml), OA (1ml), and OAm (1ml) were loaded into a 100 ml three-necked flask and heated at 130°C for 1h under  $\text{N}_2$  atmosphere. Then the reaction temperature of the mixture was increased to 180°C and 1 ml of the Cs-oleate precursor was rapidly injected. After that, the mixture solution was kept at 180°C for 30s. Then, the reaction solution was cooled in cold water. The  $\text{Mn}^{2+}$ ,  $\text{Sb}^{3+}$  co-doped  $\text{CsPbCl}_3$  NCs were obtained by regulating the molar feed ratio of  $\text{MnCl}_2/\text{SbCl}_3$ .

**Characterization:** TEM images were collected by Hitachi H-800 at 200KV. HRTEM and mapping were measured by JEM-2100F at 200KV. Absorption spectra were collected with UV/vis- spectrophotometer (Shimadzu UV-1800). Photoluminescence spectra were recorded on a Shimadzu RF-6000 spectrofluorometer. X-Ray Diffraction (XRD) patterns were measured by using a Bruker D8 diffractometer with  $\text{Cu K}\alpha$  radiation. Time-resolved emission decay curves were measured using a PLS980 time correlated single-photon counting (TCSPC) system. Low-temperature fluorescence spectroscopy was acquired using a tuneable optical parameter oscillator (OPO) as the excitation source and a visible photomultiplier (350–850 nm) combined with a double-grating monochromator for spectral collection. X-ray photoelectron spectroscopy (XPS) was collected by Kratos Axis UltraDLD. Absolute emission QY values were measured at room temperature using a commercial integrating sphere installed in FLS980 spectrometer from Edinburgh Instruments. Calibration of the photoluminescence QY value was performed using the standard sample  $\text{YAG}:\text{Ce}^{3+}$  (BM302D, Jiangsu Bree Optonics Co., Ltd, peaking at 551 nm).

### Calculation method

First-principle calculations were performed by the density functional theory (DFT) using the Vienna Ab-initio Simulation Package (VASP) package.<sup>1</sup> The generalized gradient approximation (GGA) with the Perdew–Burke–Ernzerhof (PBE) functional were used to describe the electronic exchange and correlation effects.<sup>2</sup> Uniform G-

centered k-points meshes with a resolution of  $2\pi \cdot 0.04 \text{ \AA}^{-1}$  and Methfessel-Paxton electronic smearing were adopted for the integration in the Brillouin zone for geometric optimization. The simulation was run with a cutoff energy of 500 eV throughout the computations. These settings ensure convergence of the total energies to within 1 meV per atom. Structure relaxation proceeded until all forces on atoms were less than 1 meV  $\text{\AA}^{-1}$  and the total stress tensor was within 0.01 GPa of the target value. For the  $\text{Mn}^{2+}$ - and  $\text{Sb}^{3+}$ -doped  $\text{CsPbCl}_3$  structure,  $\text{CsPbCl}_3$  with tetragonal structure (space group:  $P4mm$ ) was selected, and then we build a  $2 \times 2 \times 2$  supercell structure based on  $\text{CsPbCl}_3$  unit cell, in which one Pb atom was replaced by Mn and the other Pb atom was replaced by Sb.

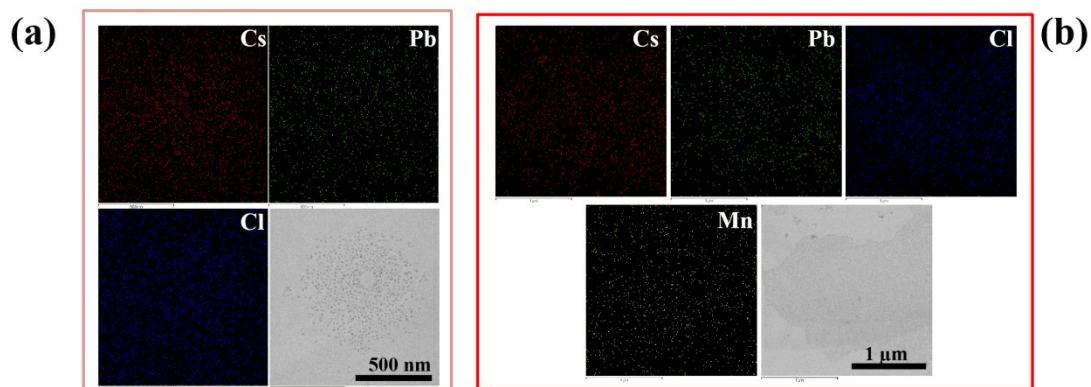

**Fig. S1.** EDS mapping images for (a)  $\text{CsPbCl}_3$ , (b)  $\text{CsPbCl}_3:\text{Mn}^{2+}$ . It can be seen that the elements in each material are evenly distributed.

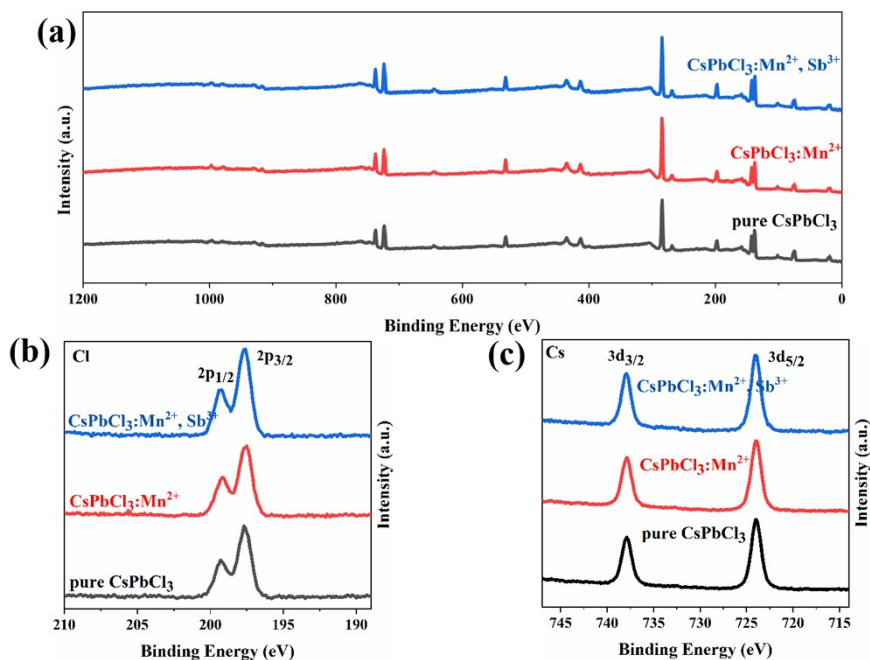

**Fig. S2.** (a) XPS total patterns, high-resolution XPS analysis of (b) Cl 2p and (c) Cs 3d for pure  $\text{CsPbCl}_3$ ,  $\text{CsPbCl}_3:\text{Mn}^{2+}$  and  $\text{CsPbCl}_3:\text{Mn}^{2+}, \text{Sb}^{3+}$  respectively.

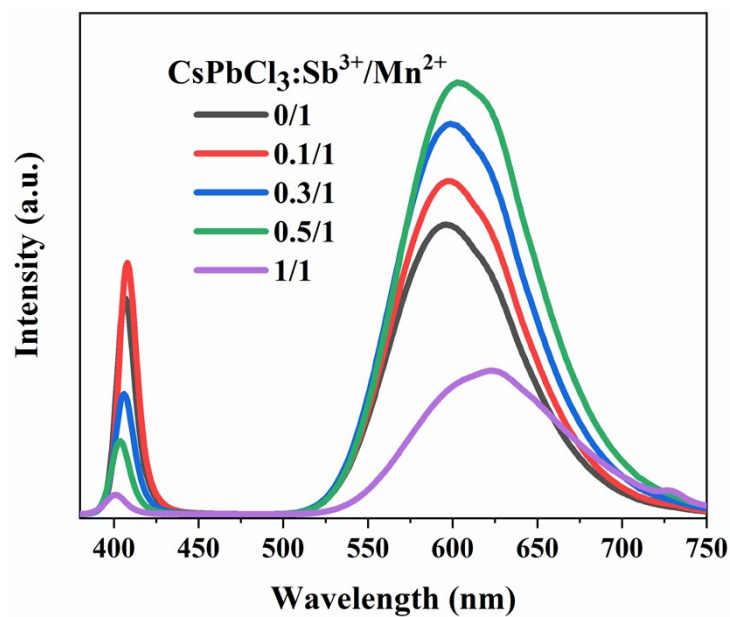

**Fig. S3.** Steady-state PL spectra for CsPbCl<sub>3</sub> NCs with varied the molar ratio of Sb<sup>3+</sup>/Mn<sup>2+</sup> upon the excitation of 365 nm source.

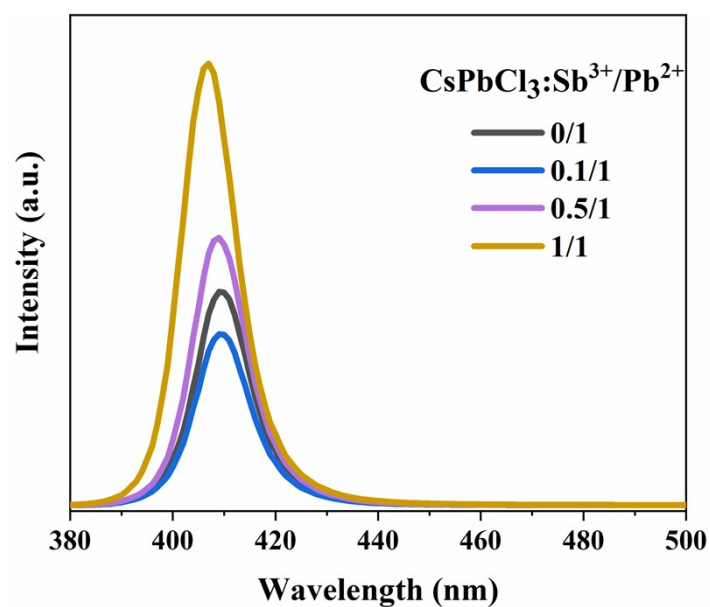

**Fig. S4.** PL spectra of CsPbCl<sub>3</sub> NCs with only Sb<sup>3+</sup> doping and changing the Sb<sup>3+</sup>/Pb<sup>2+</sup> molar ratio under excitation at 365 nm .

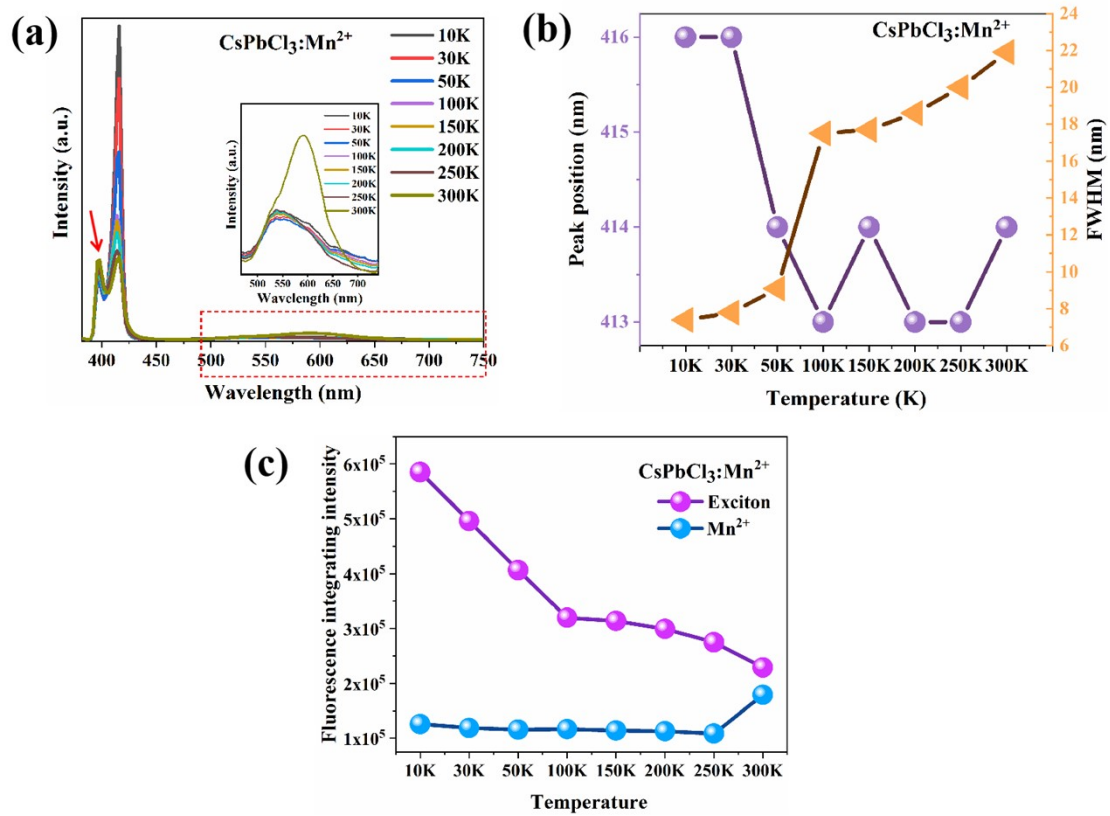

**Fig. S5.** (a) Temperature-dependent steady-state spectra (inset: enlarged image inside the dashed box) and (b) corresponding peak position and FWHM curves for CsPbCl<sub>3</sub>:Mn<sup>2+</sup> sample. (c) The plot of integrated PL intensity as a function of temperature for CsPbCl<sub>3</sub>:Mn<sup>2+</sup> sample.

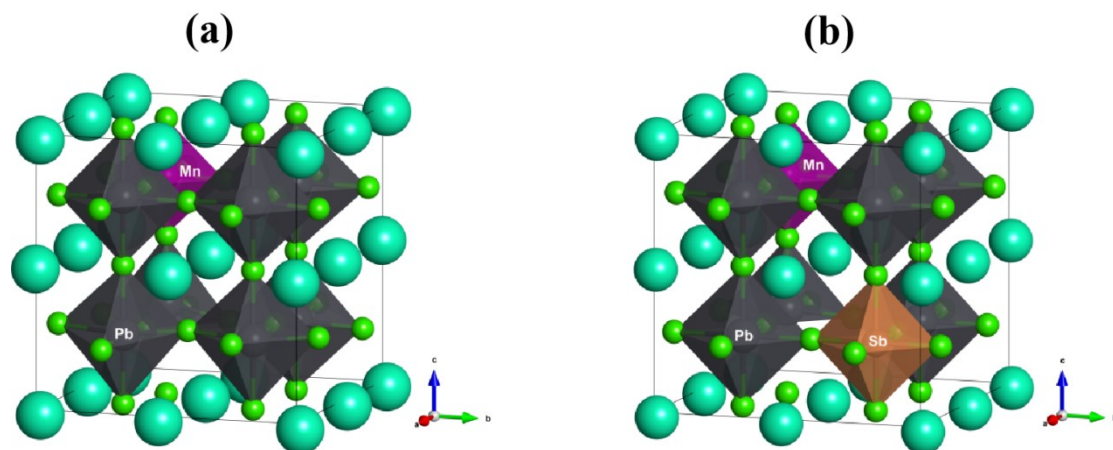

**Fig. S6.** The optimized structure of (a) CsPbCl<sub>3</sub>:Mn<sup>2+</sup> and (b) CsPbCl<sub>3</sub>:Mn<sup>2+</sup>, Sb<sup>3+</sup> structures.

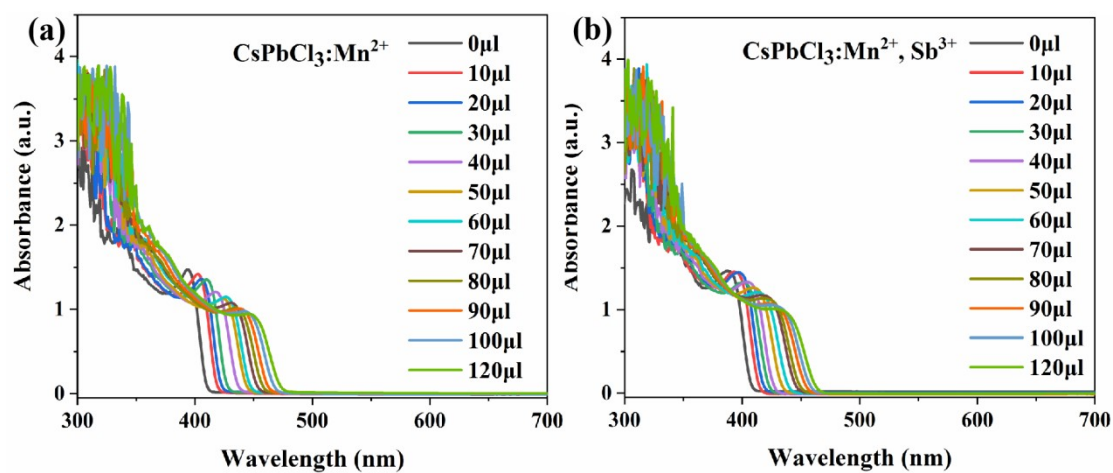

**Fig. S7.** Absorption spectra of (a)  $\text{CsPbCl}_3:\text{Mn}^{2+}$  and (b)  $\text{CsPbCl}_3:\text{Mn}^{2+}, \text{Sb}^{3+}$  samples after anion exchange with varying amounts of  $\text{PbBr}_2$ .

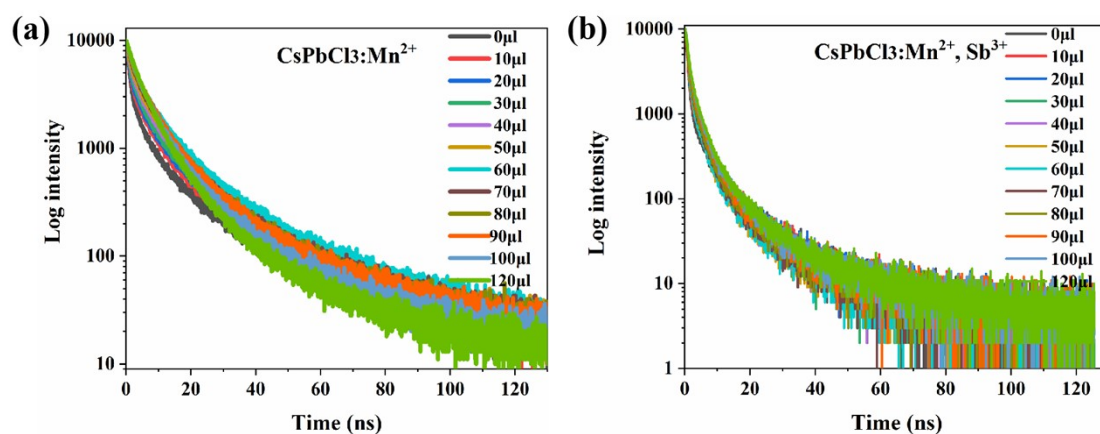

**Fig. S8.** Time-resolved PL spectra of exciton emission for (a)  $\text{CsPbCl}_3:\text{Mn}^{2+}$  and (b)  $\text{CsPbCl}_3:\text{Mn}^{2+}, \text{Sb}^{3+}$  samples.

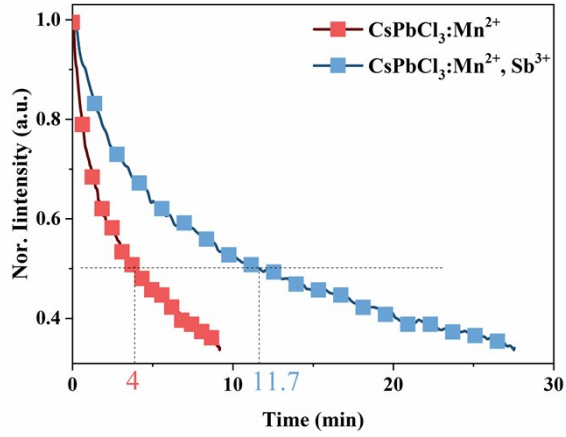

**Fig. S9.** Device stability for CsPbCl<sub>3</sub>:Mn<sup>2+</sup> (red) and CsPbCl<sub>3</sub>:Mn<sup>2+</sup>, Sb<sup>3+</sup> (blue) samples.

**Table S1.** Average lifetime data of Mn<sup>2+</sup> after single exponential fit for CsPbCl<sub>3</sub> NCs with different feed molar ratio of Mn<sup>2+</sup>/Sb<sup>3+</sup>.

| <b>Mn/Sb</b>              | <b>0.3/0</b> | <b>0.5/0</b> | <b>0.1/0.5</b> | <b>0.3/0.5</b> | <b>0.5/0.5</b> |
|---------------------------|--------------|--------------|----------------|----------------|----------------|
| <b>T<sub>ave</sub>/ms</b> | 1.63         | 1.73         | 1.70           | 1.68           | 1.67           |

**Table S2.** Emission decay of exciton for CsPbCl<sub>3</sub> NCs with different molar ratios of Mn<sup>2+</sup>/Sb<sup>3+</sup>.

| <b>Mn<sup>2+</sup>/Sb<sup>3+</sup></b> | <b>0.1/0</b> | <b>0.3/0</b> | <b>0.5/0</b> | <b>0.1/0.5</b> | <b>0.3/0.5</b> | <b>0.5/0.5</b> |
|----------------------------------------|--------------|--------------|--------------|----------------|----------------|----------------|
| <b>A1</b>                              | 9028.43      | 8526.48      | 8722.90      | 9064.97        | 9773.19        | 11054.68       |
| <b>T<sub>1</sub>/ns</b>                | 1.38         | 1.31         | 1.21         | 1.07           | 0.95           | 0.99           |
| <b>A2</b>                              | 1511.07      | 2067.68      | 1987.23      | 1648.21        | 1001.16        | 533.07         |
| <b>T<sub>2</sub>/ns</b>                | 16.0         | 10.39        | 8.04         | 8.15           | 5.37           | 4.41           |
| <b>T<sub>ave</sub>/ns</b>              | 10.96        | 10.39        | 8.04         | 8.15           | 5.37           | 4.41           |

**Table S3.** Summary of the performance of Violet LEDs.

| <b>Emission layer materials</b>                              | <b>EL peak position (nm)</b> | <b>Max EQE (%)</b> | <b>Luminance (cd/m<sup>2</sup>)</b> | <b>Ref</b>       |
|--------------------------------------------------------------|------------------------------|--------------------|-------------------------------------|------------------|
| Cs <sub>3</sub> Sb <sub>2</sub> Br <sub>9</sub> QDs          | 408                          | 0.21               | 29.60                               | 37               |
| Cs <sub>3</sub> CeBr <sub>6</sub> crystal                    | 391                          | 0.46               | -                                   | 38               |
| CsPbCl <sub>3</sub> :Mg NCs                                  | 402                          | 0.1                | 135                                 | 39               |
| CsPbCl <sub>3</sub> :Mn <sup>2+</sup> , Sb <sup>3+</sup> NCs | 413                          | 0.39               | 121                                 | <b>This work</b> |

**References:**

1. Kresse. G.; Furthmuller. Efficiency of ab-initio total energy calculations for metals and semiconductors using a plane-wave basis set. *J. Comput. Mater. Sci.*, 1996, **6**, 15–50.
2. Perdew. J. P.; Burke. K.; Ernzerhof. M. Generalized Gradient Approximation Made Simple. *Phys. Rev. Lett.*, 1996, **77**, 3865–3868.
